# Supplementary material
Source: PubMed Central journal article supplement (PMC1456866)
Supplement: plntcell_tpc.105.034041_4.pdf [file plntcell_tpc.105.034041_4.pdf]

PhCAC16.5 1 -----  
Aacys-prot 1 -MGNGRITVLLSIVLISVAPSGSCSAGEWPSGGQPEDVAGGVGGQELFERMMEKHKRVVAHPGEKARRANLNLAFVRRKNAEGRRAPSSGGQV  
McTHIOLPROT 1 --MATNSMTLILFLTYVSYSLSTKLPSEFSLLEGQENDILSSAKVSDLEGKWKELHCKTYCHEEENLRLLENFKKSKFVMEKNSERKS--ELDHTV  
GhCYSPTROT 1 ---MGFQRNLGFFLLASLSSLSSLPSEFIVEHEIDAFLSERVLELQQWKEKHKRVVRAHEBAKREHENFKGNLKYILENAKRKAN-KWEHVV  
DcCYSPTROT 1 ----MKMILSLSLSLAAAVTAADMSIITYDQTHAVG---STDVIMAAVESWLVKHKKSYNALGKKEQRFQIFKDNFLYIDQNAAKDR----SFKL  
ZmCYSPTROT 1 MAASTTAAAAASLILLVSLAAADMSIVSYGE-----RSDEBARRMYAEMMAAGRTYNAVGEERRMQVEFDNLRVIDAANAADAG-VHSFRL  
ZoCYSPTROT 1 MASFVAVVLLFLSSSALTAVSVVPLDILTLLKQAWAAPAGRSDEEVRILIQEVRVKKRPAENDDQYVGYRLEVFENLRFVDEANAADRG-EHAYRL

PhCAC16.5 1 -----NAIVTGLISLSAQELV  
Aacys-prot 100 GNNVFADLSNEEFREYVSSRVLKKAAGEGRARRRAGEGVVAGCQAPASLDWRKAGAVTAVKQDCGSCWAFSITGAMEGINAITTGLISLSAQELV  
McTHIOLPROT 97 GLNKFADLSNEEFKEMYSKVKGRSRNELKMGVVKRMSVSSRTCDAPSLDWRDGGVITPKDQCGCSCWAFSITGAMEGINAATATGDLTILSEQELV  
GhCYSPTROT 97 GLNKFADLSNEEFKAYLSKVKPINKGITLS--RMRKQVQSCDAPSLDWRNYGVVAVKDCGSCWAFSITGAMEGINAVTGDILISLSAQELV  
DcCYSPTROT 89 GLNKFADLSNEEFKSKYTGIRTID---SRKKVSGKSRYASLAGESIPESVDWREHGAVASVKDQCGCSCWAFSITGAMEGINAATGKLIILSEQELV  
ZmCYSPTROT 92 GLNKFADLSNEEFKRYVIGARTIP---QRERKLG--ARYAADNEILPESVDWRAHGAVAEVKDCGSCWAFSITGAMEGINQIVTGDILISLSAQELV  
ZoCYSPTROT 100 GNNVFADLSNEEFKARLRDLSL---GRSTSGEISIQYLREGDVLPSLDWRKAGAVAVKQDCGSCWAFSITGAMEGINQIVTGDILISLSAQELV

PhCAC16.5 18 NCDSTLYGCGGGMPSAFEWIINNGGIDSADYPYTAIQG---TNTITKEKTKVVIDEYQDVAQ--ESALLCAAQPVSVGIDGSSIDFQLYGGIY  
Aacys-prot 200 DCDTINEGCGGGMPSAFEWIINNGGIDSEANYPYTAQADS--VNTITKEEKVVSIDYEDVAT--ESALLCAAQPVSVGIDGSSIDFQLYGGIY  
McTHIOLPROT 197 DCDTLYGCGGGMPSAFEWIINNGGIDSEDDYPYTAQADS---TNTITKEEKVVSIDYEDVAT--ESALLCAAQPVSVGIDGSSIDFQLYGGIY  
GhCYSPTROT 194 ECDTINNYGCGGGMPSAFEWIINNGGIDSESDYPYTAQ---VDGTNTITKEEKVVSIDYEDVAT--ESALLCAAQPVSVGIDGSSIDFQLYGGIY  
DcCYSPTROT 186 DCDTINNYGCGGGMPSAFEWIINNGGIDSEADYPYTAQDQ---CDYVKNKAKVVIDSYEDVPEYDERALQKAAANQPTVAIEASCRDFQFDSGIF  
ZmCYSPTROT 187 DCDTINNYGCGGGMPSAFEWIINNGGIDSEKDYPTKCTDGR---CDVKNKAKVVIDSYEDVPEYDERALQKAAANQPTVAIEASCRDFQFDSGIF  
ZoCYSPTROT 197 DCDTINNYGCGGGMPSAFEWIINNGGIDSEADYPYTAQDQ---TNTITKEEKVVSIDYEDVAT--ESALLCAAQPVSVGIDGSSIDFQLYGGIY

PhCAC16.5 113 DDCSSENFNDVHDHAVLVVGYGSGDDHYWILKNSWGTSGWMEGYAYIKRNTDISYGVCLINSMASYPTKESSSPP-----YSPALFPFPFSPSE  
Aacys-prot 296 DDCSSENFNDVHDHAVLVVGYGSGDDHYWILKNSWGTSGWMEGYAYIKRNTDISYGVCLINSMASYPTKESSSPP-----YSPALFPFPFSPSE  
McTHIOLPROT 295 NDCSSENFNDVHDHAVLVVGYGSGDDHYWILKNSWGTSGWMEGYAYIKRNTDISYGVCLINSMASYPTKESSSPP-----YSPALFPFPFSPSE  
GhCYSPTROT 289 DDCSSENFNDVHDHAVLVVGYGSGDDHYWILKNSWGTSGWMEGYAYIKRNTDISYGVCLINSMASYPTKESSSPP-----YSPALFPFPFSPSE  
DcCYSPTROT 283 TDCSSENFNDVHDHAVLVVGYGSGDDHYWILKNSWGTSGWMEGYAYIKRNTDISYGVCLINSMASYPTKESSSPP-----YSPALFPFPFSPSE  
ZmCYSPTROT 284 TDCSSENFNDVHDHAVLVVGYGSGDDHYWILKNSWGTSGWMEGYAYIKRNTDISYGVCLINSMASYPTKESSSPP-----YSPALFPFPFSPSE  
ZoCYSPTROT 293 TDCSSENFNDVHDHAVLVVGYGSGDDHYWILKNSWGTSGWMEGYAYIKRNTDISYGVCLINSMASYPTKESSSPP-----YSPALFPFPFSPSE

PhCAC16.5 208 CGDYYSFGSIGQTCCELELIGVCFIQGCCPYENVCCKDKSEYCCPSGYSVCSNQCMLKEYGDYLGVAARKRRKAKYKLSNSTSTKLTMEMDQHLQWK  
Aacys-prot 396 CGDYYSFGSIGQTCCELELIGVCFIQGCCPYENVCCKDKSEYCCPSGYSVCSNQCMLKEYGDYLGVAARKRRKAKYKLSNSTSTKLTMEMDQHLQWK  
McTHIOLPROT 395 CGDYYSFGSIGQTCCELELIGVCFIQGCCPYENVCCKDKSEYCCPSGYSVCSNQCMLKEYGDYLGVAARKRRKAKYKLSNSTSTKLTMEMDQHLQWK  
GhCYSPTROT 369 -SVLHRTFFNFTHHISITK-----  
DcCYSPTROT 370 CDYYSFGSIGQTCCELELIGVCFIQGCCPYENVCCKDKSEYCCPSGYSVCSNQCMLKEYGDYLGVAARKRRKAKYKLSNSTSTKLTMEMDQHLQWK  
ZmCYSPTROT 371 CDYYSFGSIGQTCCELELIGVCFIQGCCPYENVCCKDKSEYCCPSGYSVCSNQCMLKEYGDYLGVAARKRRKAKYKLSNSTSTKLTMEMDQHLQWK  
ZoCYSPTROT 384 CDYYSFGSIGQTCCELELIGVCFIQGCCPYENVCCKDKSEYCCPSGYSVCSNQCMLKEYGDYLGVAARKRRKAKYKLSNSTSTKLTMEMDQHLQWK

PhCAC16.5 307 RNEFLEMLKVQLIKKTLRLSNGSRY  
Aacys-prot 495 RDGVAALR-----  
McTHIOLPROT 494 RNPFAAAA-----  
GhCYSPTROT -----  
DcCYSPTROT -----  
ZmCYSPTROT -----  
ZoCYSPTROT -----
