# Supplementary material
Source: PubMed Central journal article supplement (PMC1456866)
Supplement: plntcell_tpc.105.034041_6.pdf [file plntcell_tpc.105.034041_6.pdf]

**Supplemental Table 1: Complementation analysis of *ph2*, *ph3* and *ph4* mutants.**

| mutant           | tester line                | Number of progeny with flower color phenotype <sup>1</sup> |                      |
|------------------|----------------------------|------------------------------------------------------------|----------------------|
|                  |                            | “wild type” ( <i>PH</i> )                                  | mutant ( <i>ph</i> ) |
| <i>ph3-V2068</i> | V23 ( <i>ph1</i> )         | 18                                                         | 0                    |
| <i>ph3-V2068</i> | V26 ( <i>ph2</i> )         | 6                                                          | 0                    |
| <i>ph3-V2068</i> | R143 ( <i>ph3</i> )        | 0                                                          | 18                   |
| <i>ph3-V2068</i> | V64 ( <i>ph4</i> )         | 14                                                         | 0                    |
| <i>ph3-V2068</i> | W160 ( <i>an1</i> )        | 18                                                         | 0                    |
| <i>ph4-V2153</i> | V23 ( <i>ph1</i> )         | 29                                                         | 0                    |
| <i>ph4-V2153</i> | V26 ( <i>ph2</i> )         | 6                                                          | 0                    |
| <i>ph4-V2153</i> | R143 ( <i>ph3</i> )        | 16                                                         | 0                    |
| <i>ph4-V2153</i> | R144 ( <i>ph3-V2068</i> )  | 24                                                         | 0                    |
| <i>ph4-V2153</i> | V64 ( <i>ph4</i> )         | 0                                                          | 18                   |
| <i>ph4-V2153</i> | V63( <i>ph4</i> )          | 0                                                          | 14                   |
| <i>ph4-V2153</i> | V69 ( <i>ph5</i> )         | 15                                                         | 0                    |
| <i>ph4-V2153</i> | W160 ( <i>an1</i> )        | 16                                                         | 0                    |
| <i>ph4-V2166</i> | V23 ( <i>ph1</i> )         | 18                                                         | 0                    |
| <i>ph4-V2166</i> | V26 ( <i>ph2</i> )         | 6                                                          | 0                    |
| <i>ph4-V2166</i> | R143 ( <i>ph3</i> )        | 18                                                         | 0                    |
| <i>ph4-V2166</i> | V64 ( <i>ph4</i> )         | 1 (revertant)                                              | 13                   |
| <i>ph4-V2166</i> | R152 ( <i>ph4-G5037</i> )  | 2 (revertant)                                              | 15                   |
| <i>ph4-V2166</i> | V69 ( <i>ph5</i> )         | 18                                                         | 0                    |
| <i>ph4-V2166</i> | W160 ( <i>an1</i> )        | 15                                                         | 0                    |
| <i>ph4-X2377</i> | V23 ( <i>ph1</i> )         | 15                                                         | 0                    |
| <i>ph4-X2377</i> | V26 ( <i>ph2</i> )         | 35                                                         | 0                    |
| <i>ph4-X2377</i> | R144 ( <i>ph3-V2068</i> )  | 40                                                         | 0                    |
| <i>ph4-X2377</i> | R152 ( <i>ph4-G5037</i> )  | 0                                                          | 40                   |
| <i>ph4-X2377</i> | R150 ( <i>ph4-V2166</i> )  | 0                                                          | 19                   |
| <i>ph4-X2377</i> | V69 ( <i>ph5</i> )         | 40                                                         | 0                    |
| <i>ph4-X2377</i> | W160 ( <i>an1</i> )        | 40                                                         | 0                    |
| <i>ph4-X2377</i> | R146 ( <i>ph7</i> )        | 40                                                         | 0                    |
| <i>ph4-X2052</i> | V23 ( <i>ph1</i> )         | 12                                                         | 0                    |
| <i>ph4-X2052</i> | V26 ( <i>ph2</i> )         | 34                                                         | 0                    |
| <i>ph4-X2052</i> | R 152 ( <i>ph4-G5037</i> ) | 0                                                          | 9                    |
| <i>ph4-X2052</i> | V69 ( <i>ph5</i> )         | 21                                                         | 0                    |
| <i>ph4-X2052</i> | R159 ( <i>ph5-A2209</i> )  | 38                                                         | 0                    |
| <i>ph4-X2052</i> | W160 ( <i>an1</i> )        | 13                                                         | 0                    |
| <i>ph4-X2052</i> | R146 ( <i>ph7</i> )        | 8                                                          | 0                    |
| <i>ph4-B3021</i> | V23 ( <i>ph1</i> )         | 20                                                         | 0                    |
| <i>ph4-B3021</i> | V26 ( <i>ph2</i> )         | 44                                                         | 0                    |
| <i>ph4-B3021</i> | R143 ( <i>ph3</i> )        | 40                                                         | 0                    |
| <i>ph4-B3021</i> | R144 ( <i>ph3-V2068</i> )  | 20                                                         | 0                    |
| <i>ph4-B3021</i> | R149 ( <i>ph4-V2153</i> )  | 0                                                          | 37                   |
| <i>ph4-B3021</i> | V69 ( <i>ph5</i> )         | 20                                                         | 0                    |
| <i>ph4-B3021</i> | W160 ( <i>an1</i> )        | 20                                                         | 0                    |
| <i>ph4-B3021</i> | R146 ( <i>ph7</i> )        | 24                                                         | 0                    |
| <i>ph4-C3540</i> | V23 ( <i>ph1</i> )         | 20                                                         | 0                    |
| <i>ph4-C3540</i> | V26 ( <i>ph2</i> )         | 36                                                         | 0                    |
| <i>ph4-C3540</i> | R143 ( <i>ph3</i> )        | 33                                                         | 0                    |
| <i>ph4-C3540</i> | R149 ( <i>ph4-V2153</i> )  | 0                                                          | 37                   |
| <i>ph4-C3540</i> | V63 ( <i>ph4</i> )         | 0                                                          | 36                   |
| <i>ph4-C3540</i> | V69 ( <i>ph5</i> )         | 34                                                         | 0                    |
| <i>ph4-C3540</i> | W160 ( <i>an1</i> )        | 35                                                         | 0                    |
| <i>ph2-A2414</i> | V23 ( <i>ph1</i> )         | 30                                                         | 0                    |
| <i>ph2-A2414</i> | V26 ( <i>ph2</i> )         | 1 (revertant)                                              | 66                   |
| <i>ph2-A2414</i> | R144 ( <i>ph3-V2068</i> )  | 35                                                         | 0                    |
| <i>ph2-A2414</i> | R147 ( <i>ph4-X2052</i> )  | 28                                                         | 0                    |
| <i>ph2-A2414</i> | R149 ( <i>ph4-V2153</i> )  | 40                                                         | 0                    |
| <i>ph2-A2414</i> | V69 ( <i>ph5</i> )         | 30                                                         | 0                    |
| <i>ph2-A2414</i> | W138 ( <i>an1-W138</i> )   | 40                                                         | 0                    |

<sup>1</sup> In crosses with the *HFI* lines V23, V26, V64 and V69 a wild type phenotype (*PH*) was seen as a “reddish-violet” flower color, whereas a mutant phenotype (*ph*) appears as “blue-violet” color, similar to the colors shown in Figure 2H and 2 J. In crosses with the *hflhf2* lines R143, R149, W160 and R146 the *PH* phenotype is seen as a “red” flower color (cf Figure 2A), whereas, a mutant (*ph*) phenotype is seen as a “purplish” color (cf. Figure 2C and 2D).
