# Supplementary material
Source: PubMed Central journal article supplement (PMC1456866)

**A**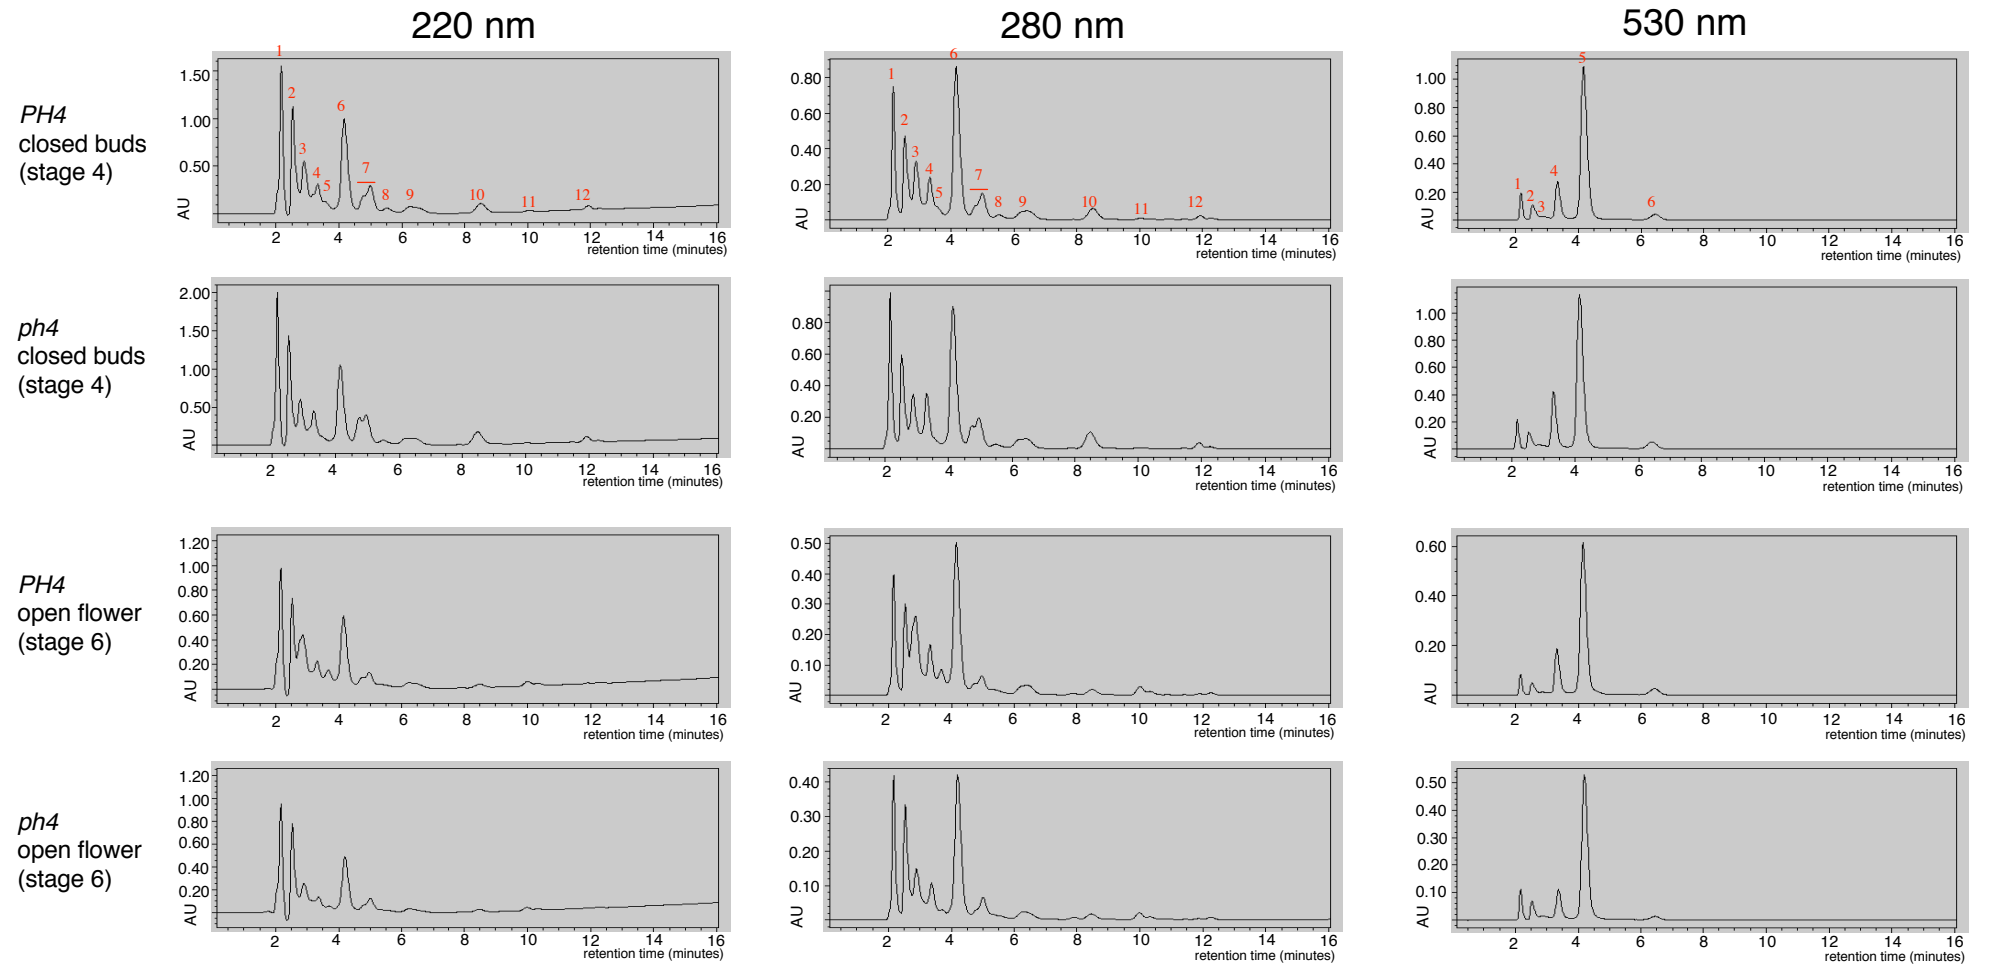

# B

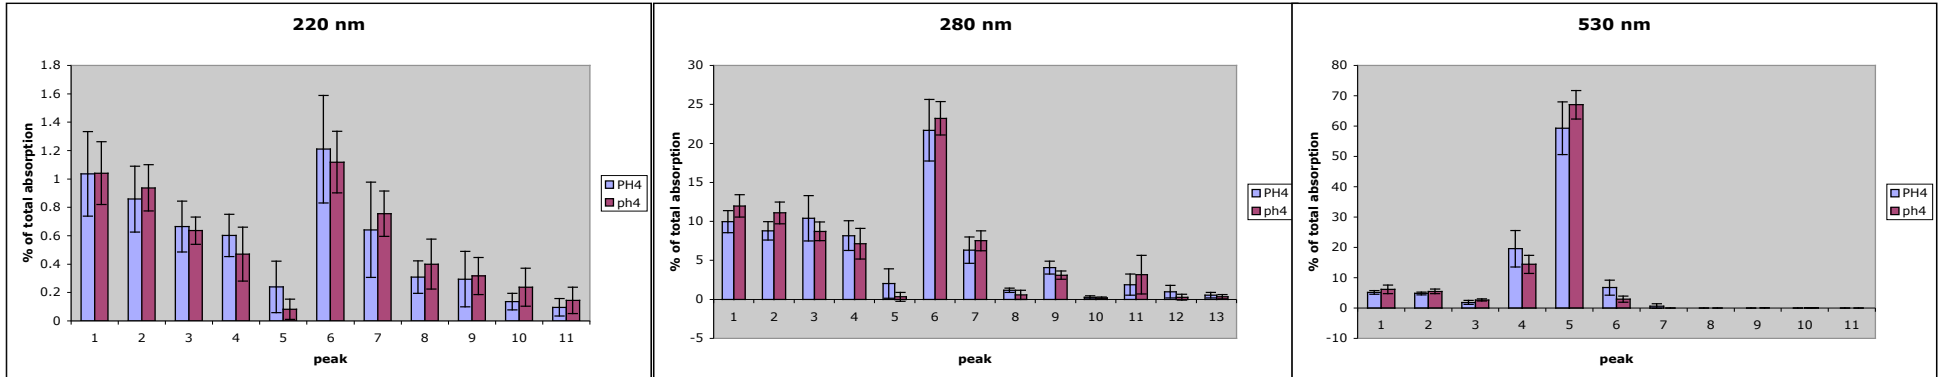

Supplement: plntcell_tpc.105.034041_1.pdf [file plntcell_tpc.105.034041_1.pdf]

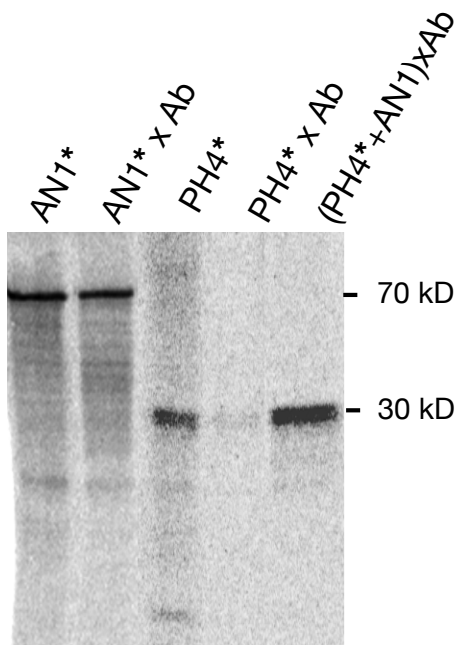

Supplement: plntcell_tpc.105.034041_3.pdf [file plntcell_tpc.105.034041_3.pdf]

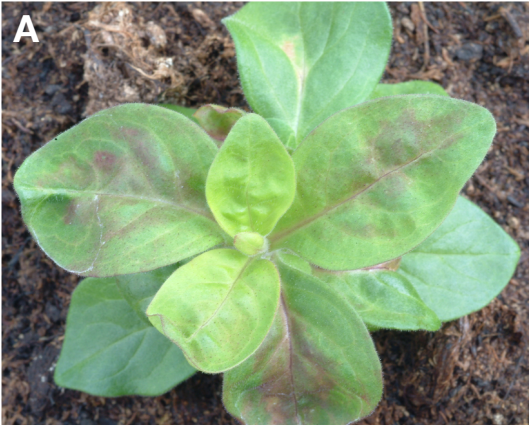

**B**

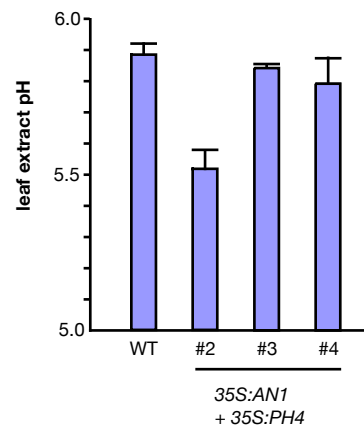

Supplement: plntcell_tpc.105.034041_5.pdf [file plntcell_tpc.105.034041_5.pdf]
